# Supplementary material for: High performance tandem organic solar cells via a strongly infrared-absorbing narrow bandgap acceptor
Source: PubMed Central journal article supplement (PMC7794321; doi:10.1038/s41467-020-20431-6), 2021-01-08
Supplement: 41467_2020_20431_MOESM1_ESM.pdf [file 41467_2020_20431_MOESM1_ESM.pdf]

## **SUPPLEMENTARY INFORMATION**

**High performance tandem organic solar cells *via* a strongly infrared-absorbing  
narrow bandgap acceptor**

## SUPPLEMENTARY FIGURES

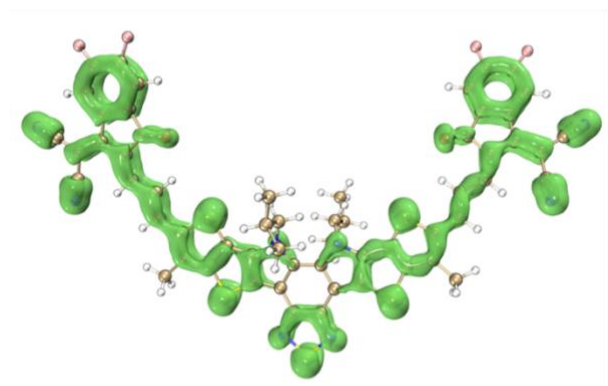

**BTPV-4F**

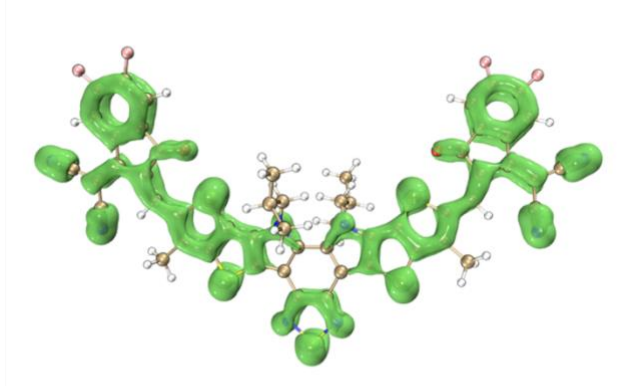

**Y6**

**Supplementary Fig. 1.** Simulated localized orbital locator obtained by DFT calculations for simplified molecules of BTPV-4F and Y6.

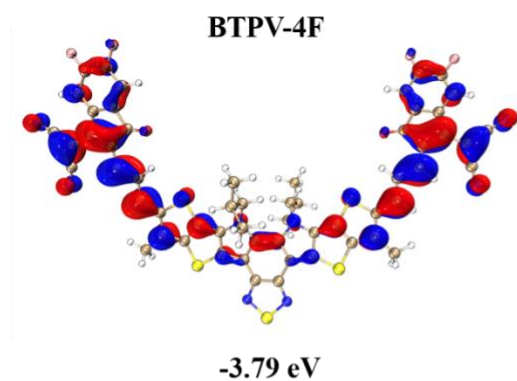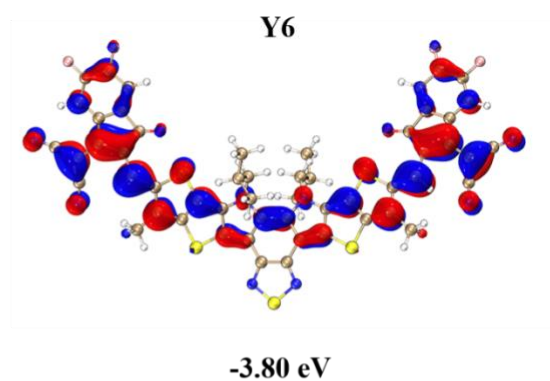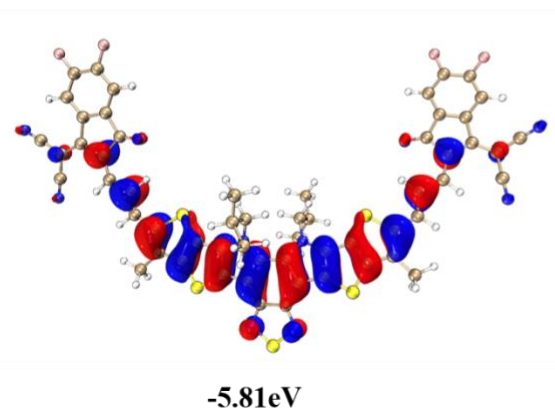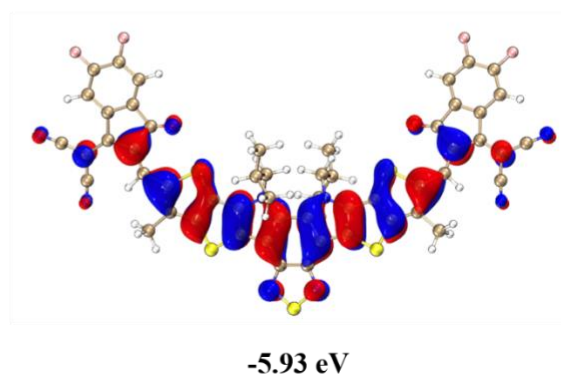

**Supplementary Fig. 2.** Simulated frontier molecular orbitals obtained by DFT calculations for simplified molecules of BTPV-4F and Y6.

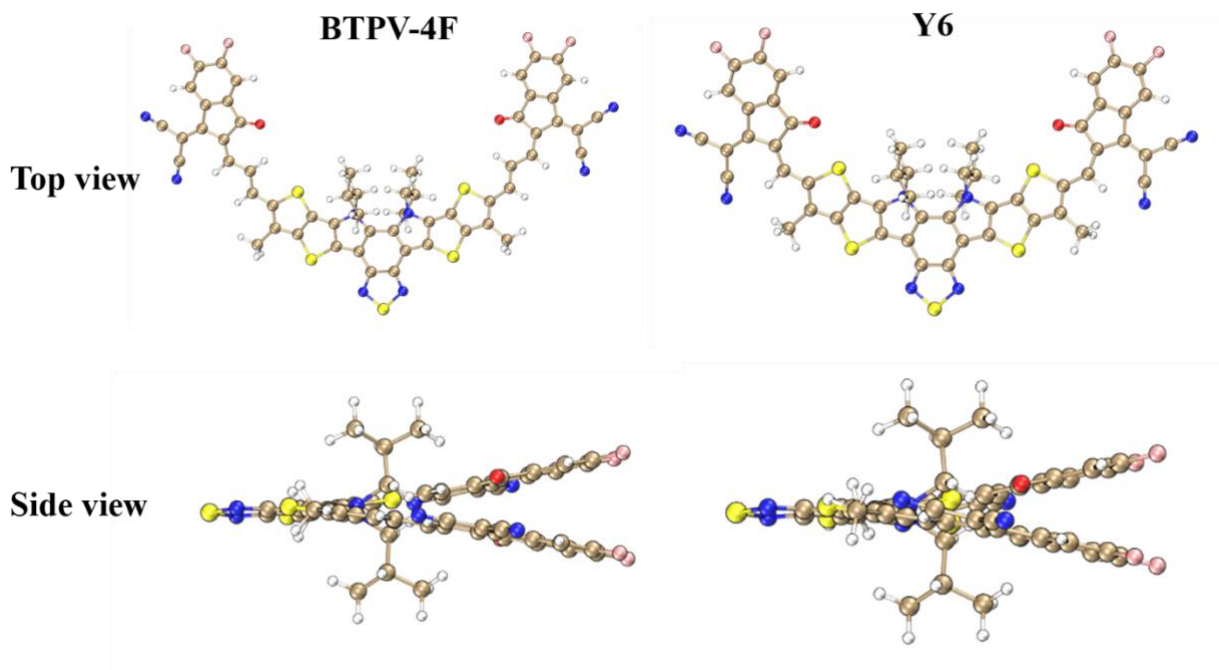

**Supplementary Fig. 3.** Simulated optimized geometries obtained by DFT calculations for simplified molecules of BTPV-4F and Y6.

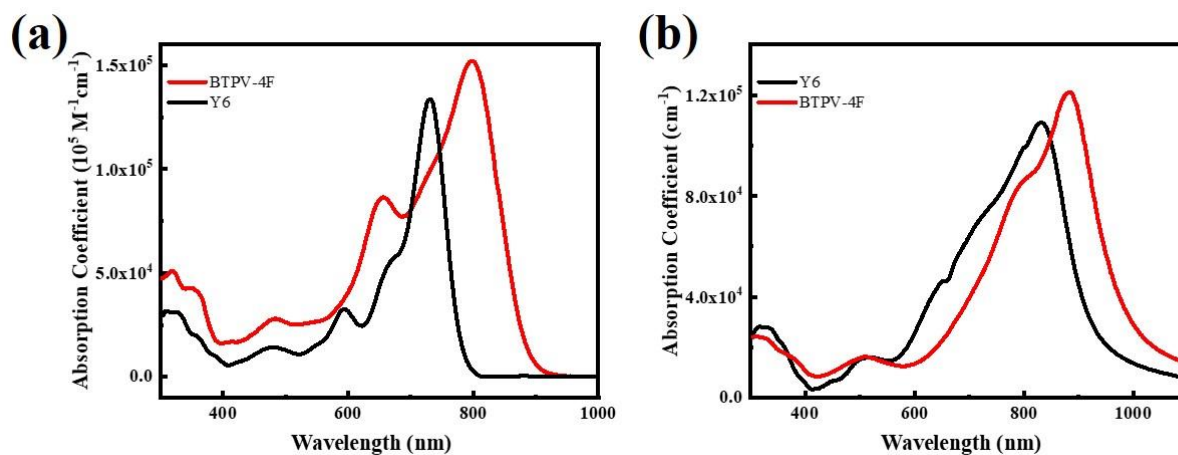

**Supplementary Fig. 4** (a) Absorption spectra of BTPV-4F and Y6 in chloroform solution. (b) Absorption spectra of BTPV-4F and Y6 films.

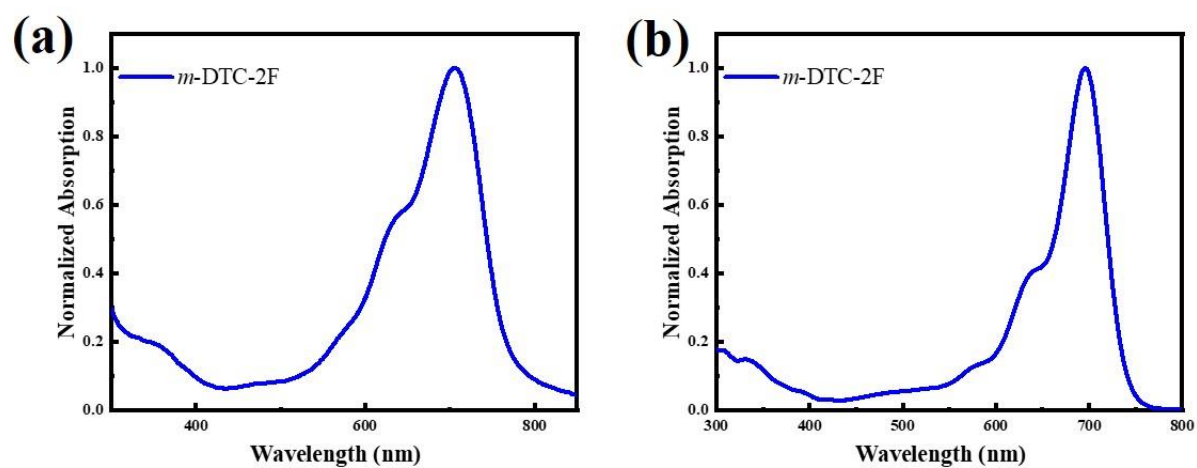

**Supplementary Fig. 5** (a) Normalized absorption spectrum of the *m*-DTC-2F film. (b) Normalized absorption spectrum of the *m*-DTC-2F in chloroform solution.

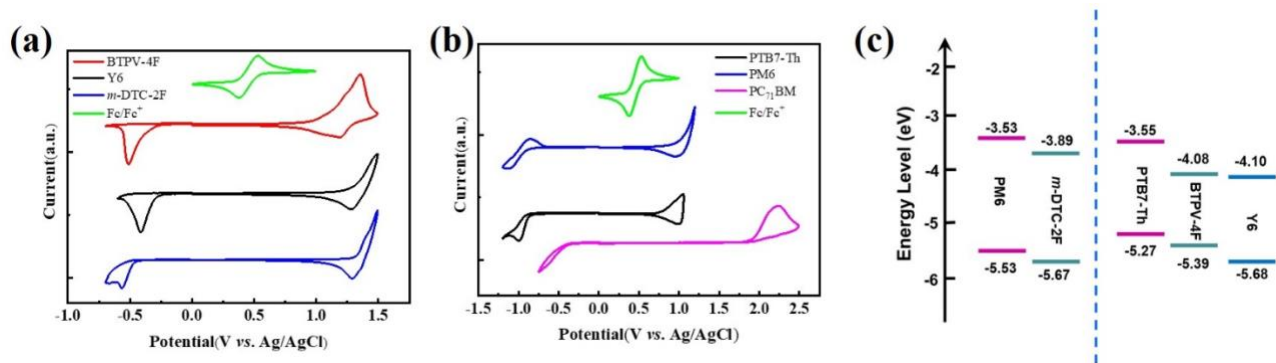

**Supplementary Fig. 6.** Cyclic voltammograms of (a) acceptors of BTPV-4F, Y6 and *m*-DTC-2F, and (b) donors of PTB7-Th and PM6 and acceptor PC<sub>71</sub>BM . (c) Energy level diagram of the donor and acceptor.

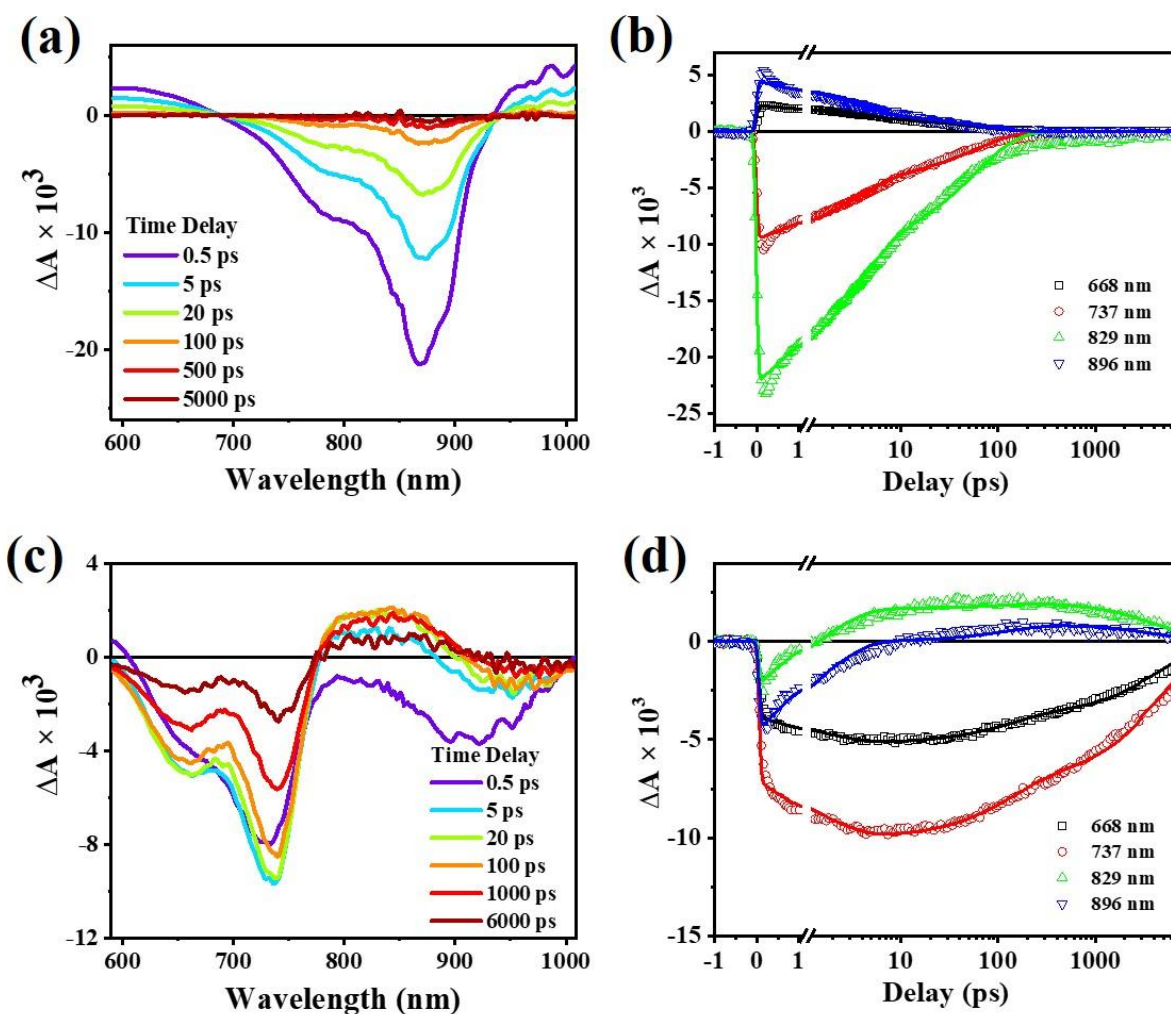

**Supplementary Fig. 7** (a) Femtosecond transient absorption spectra of the pristine BTPV-4F film at selected time delays. (b) Transient kinetics of pristine BTPV-4F film at selected wavelengths with global fitting. (c) Femtosecond transient absorption spectra of PTB7-Th: BTPV-4F blend film at selected time delays. (d) Transient kinetics of pristine PTB7-Th: BTPV-4F blend film at selected wavelengths with global fitting.

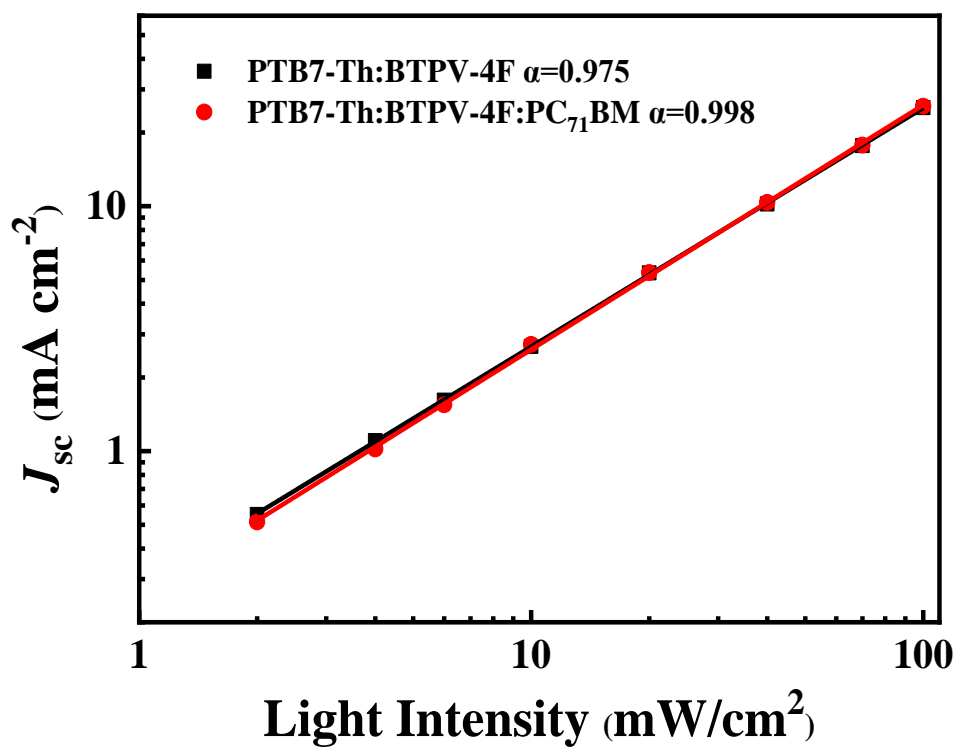

Supplementary Fig. 8. Dependence of  $J_{sc}$  of the OSCs *versus* the light intensity irradiated.

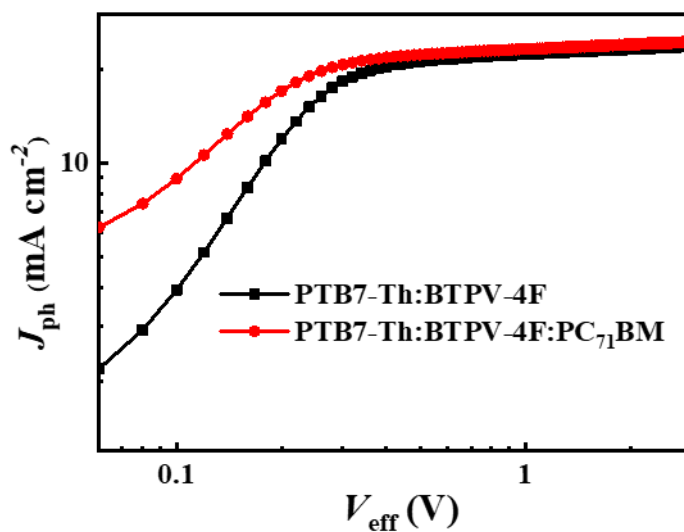

Supplementary Fig. 9. Plots of photocurrent density ( $J_{ph}$ ) *versus* effective voltage ( $V_{eff}$ ) of the binary and the ternary OSCs.



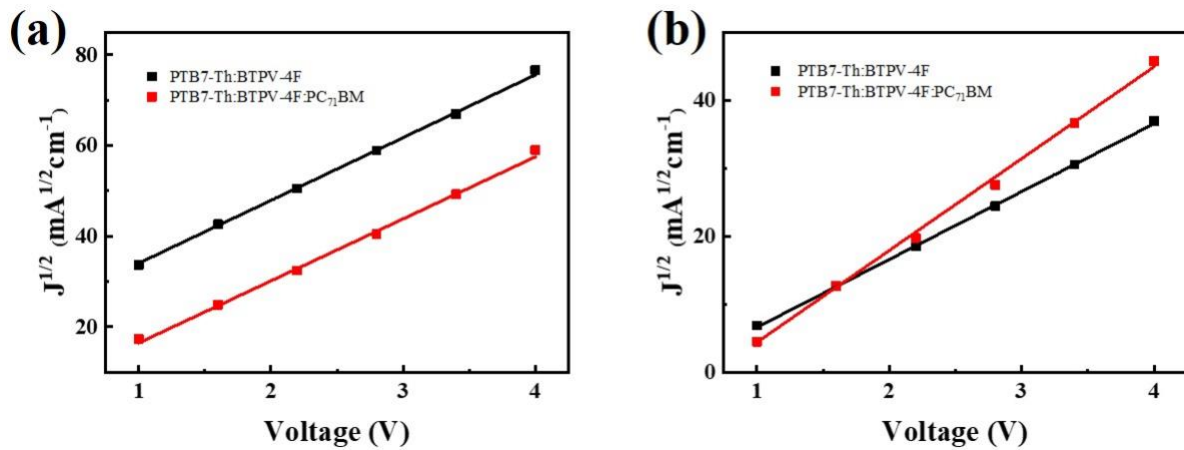

**Supplementary Fig. 10.** The mobilities measurement plots of (a) hole-only devices and (b) electron-only devices based on different blend active layers.

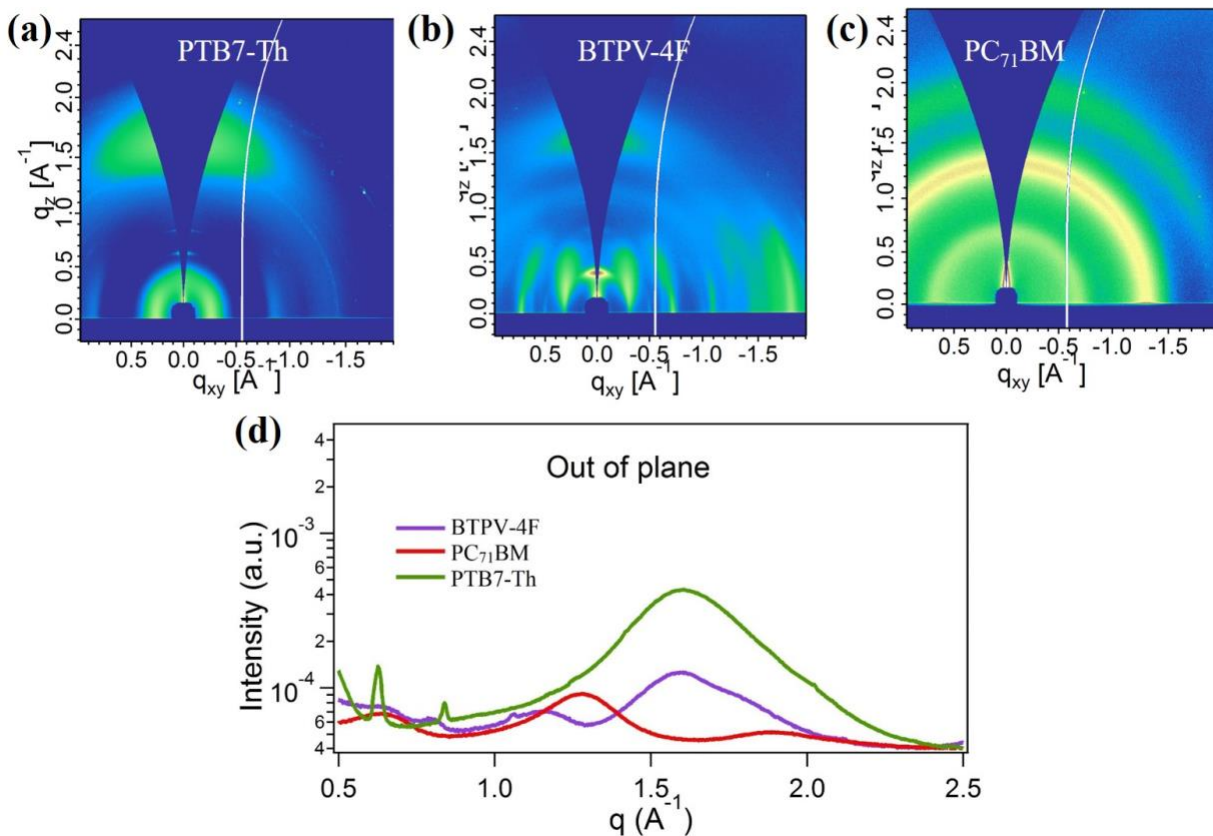

**Supplementary Fig. 11.** (a) GIWAXS images of PTB7-Th. (b) GIWAXS images of BTPV-4F. (c) GIWAXS images of PC<sub>71</sub>BM. (d) Corresponding out-of-plane line cuts of the GIWAXS images of neat films of PTB7-Th, BTPV-4F and PC<sub>71</sub>BM.

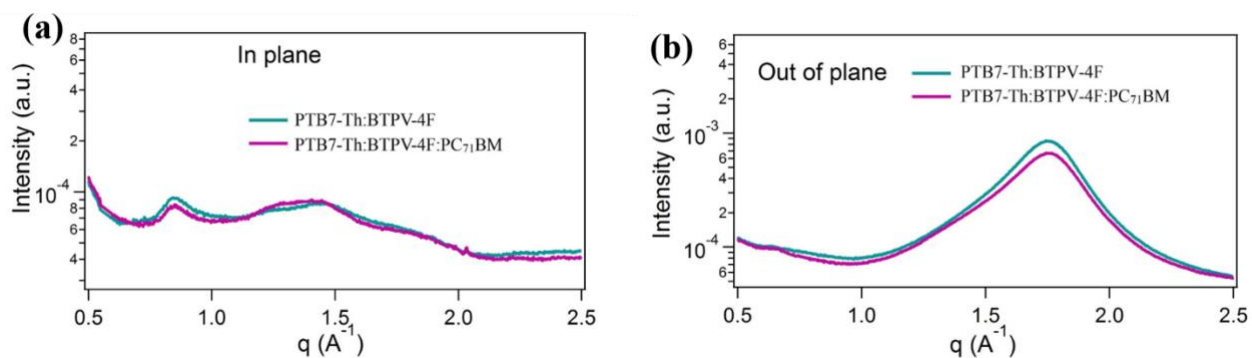

**Supplementary Fig. 12.** (a) In-plane line cuts of the GIWAXS images of blend films. (b) Out-of-plane line cuts of the GIWAXS images of blend films.

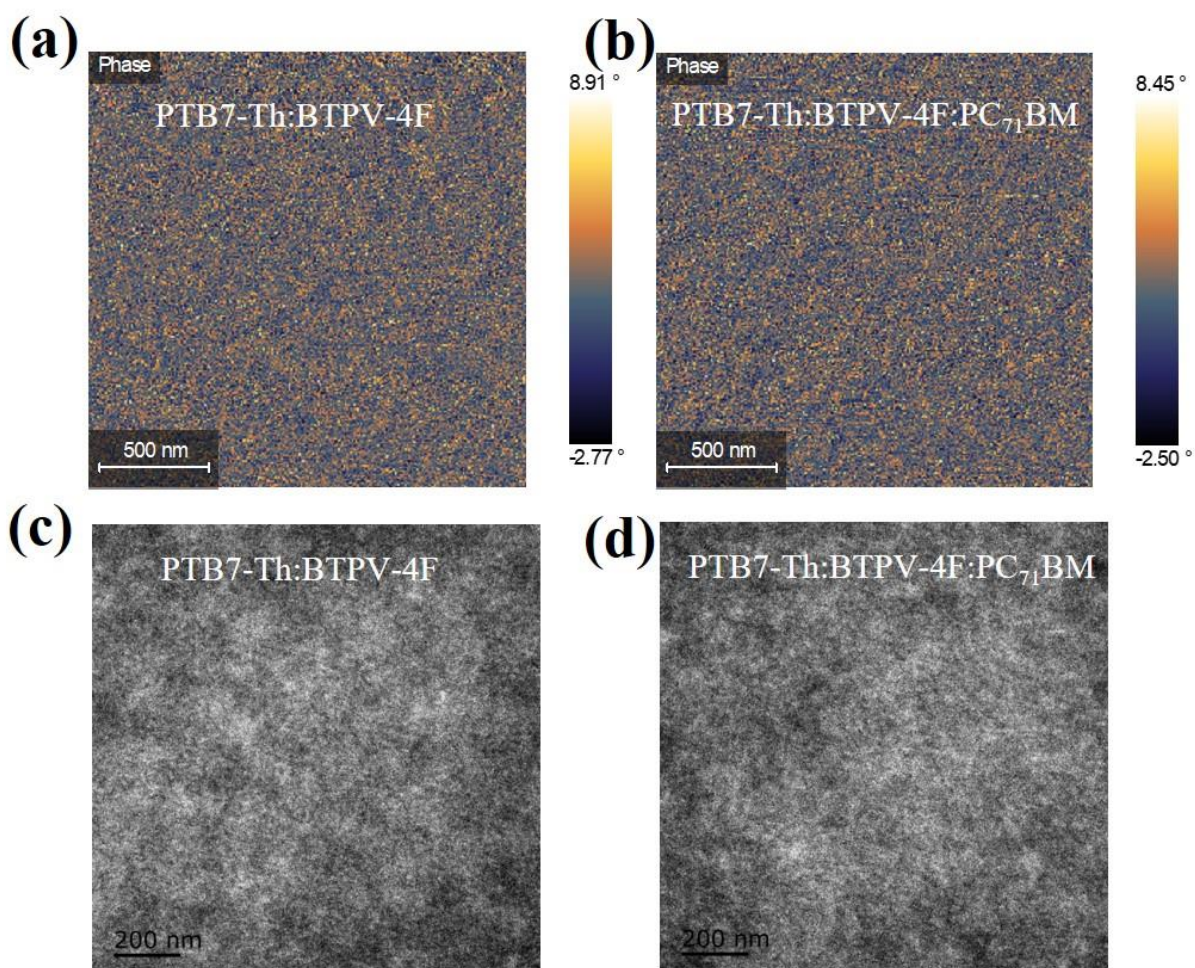

**Supplementary Fig. 13.** AFM phase images of (a) binary blend film of PTB7-Th:BTPV-4F and (b) ternary blend film of PTB7-Th:BTPV-4F:PC<sub>71</sub>BM. TEM images of (c) PTB7-Th:BTPV-4F and (d) PTB7-Th:BTPV-4F:PC<sub>71</sub>BM films.

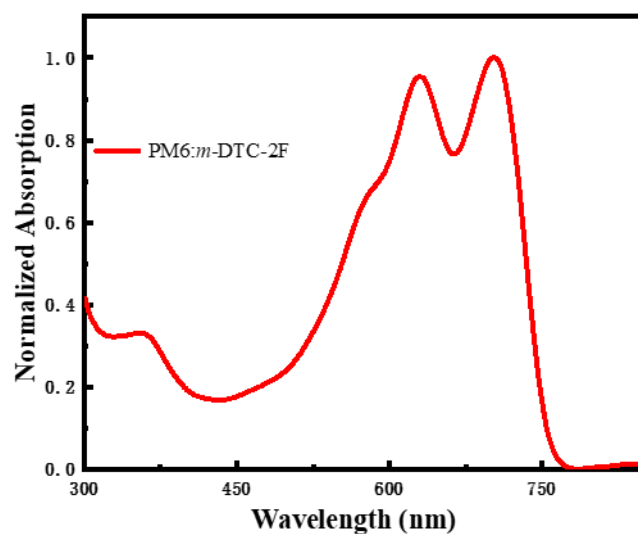

**Supplementary Fig. 14.** Film absorption spectrum of PM6:m-DTC-2F blend.

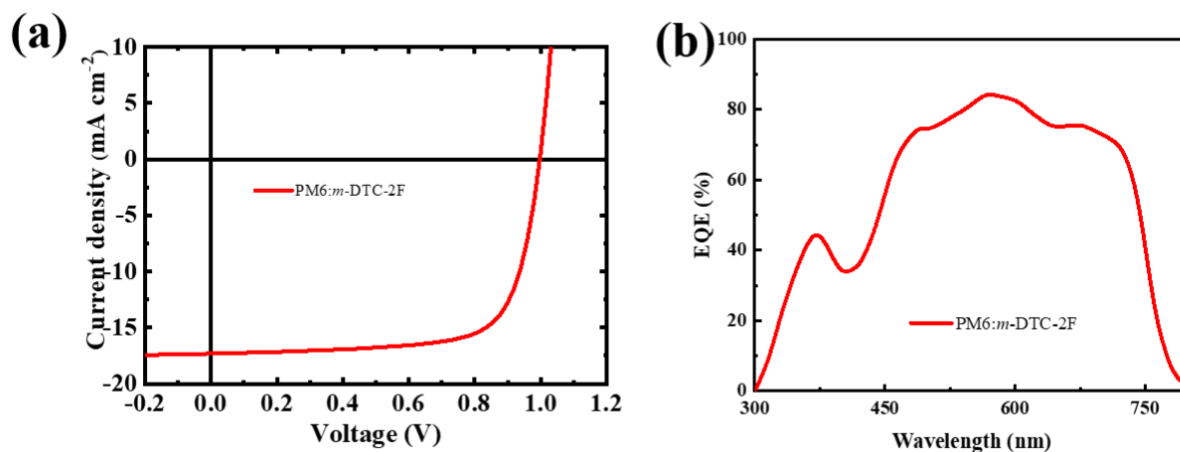

**Supplementary Fig. 15.** (a) The  $J$ - $V$  curves of the OSCs based on PM6:m-DTC-2F with 100 nm active layer under the illumination of AM1.5G, 100 mW cm<sup>-2</sup>. (b) EQE spectra of the corresponding OSCs.

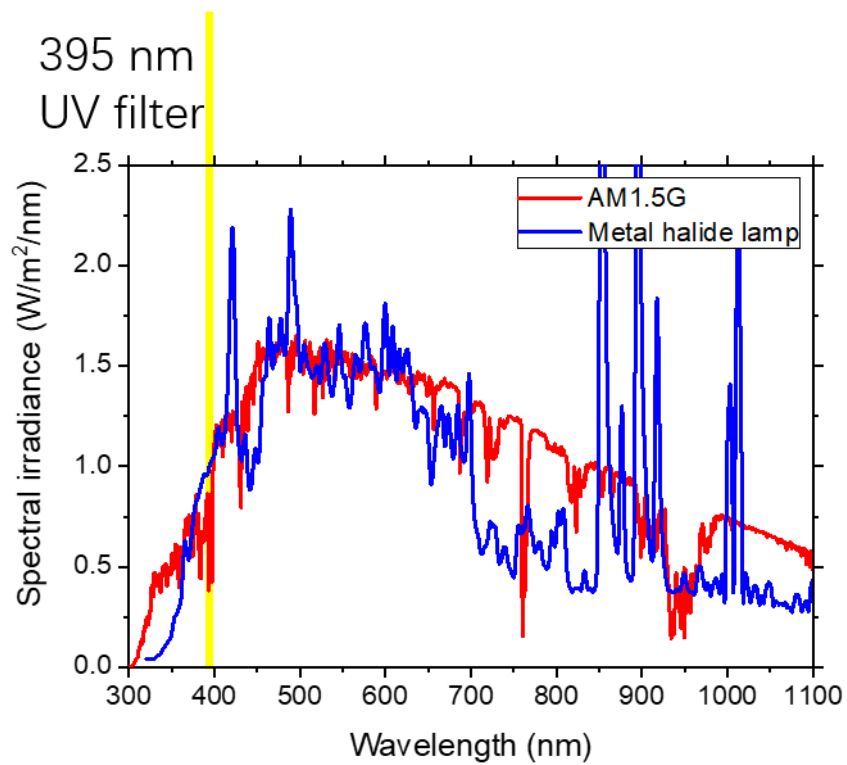

**Supplementary Fig. 16.** Illumination spectrum of light source used in stability test.

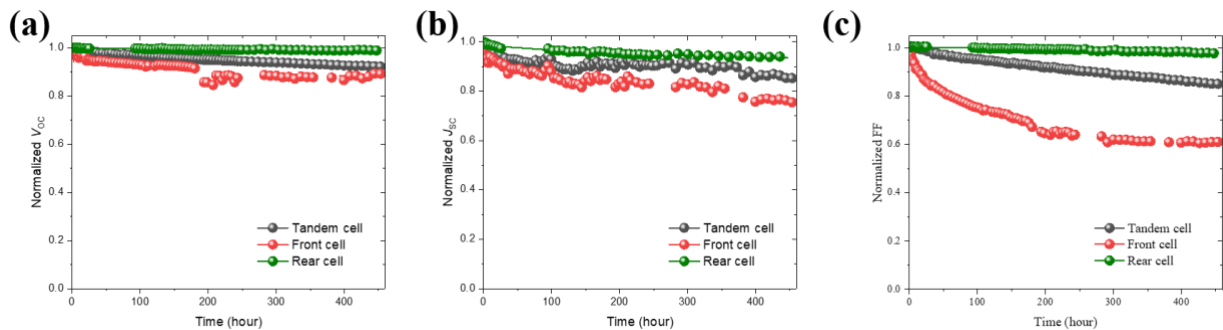

**Supplementary Fig. 17.** Evolution of (a) open-circuit voltage, (b) short-circuit current density and (c) fill factor in the test of photostability.

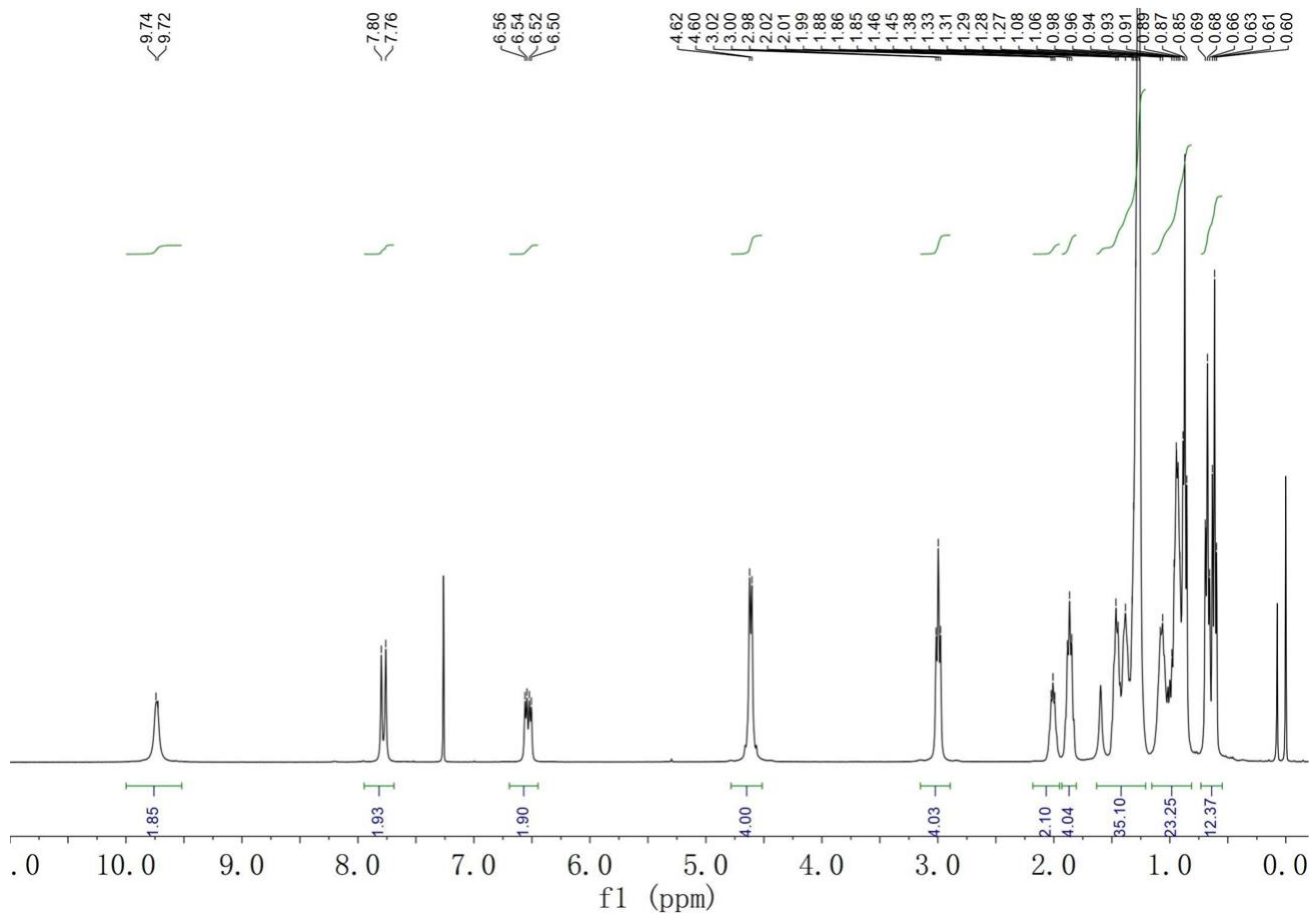

**Supplementary Fig. 18.**  $^1\text{H}$ NMR spectra of BTPV-CHO.

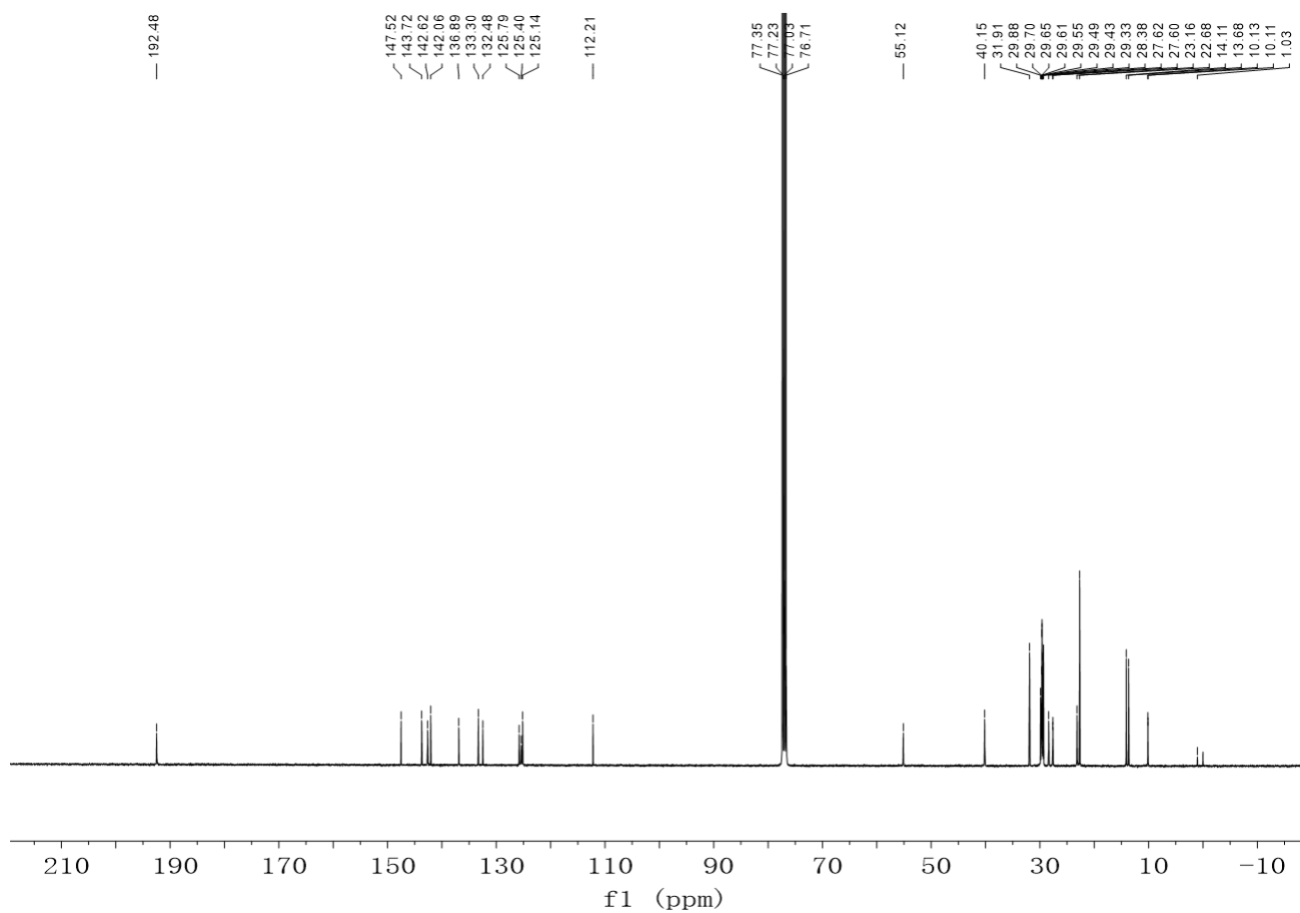

**Supplementary Fig. 19.**  $^{13}\text{C}$ NMR spectra of BTPV-CHO.

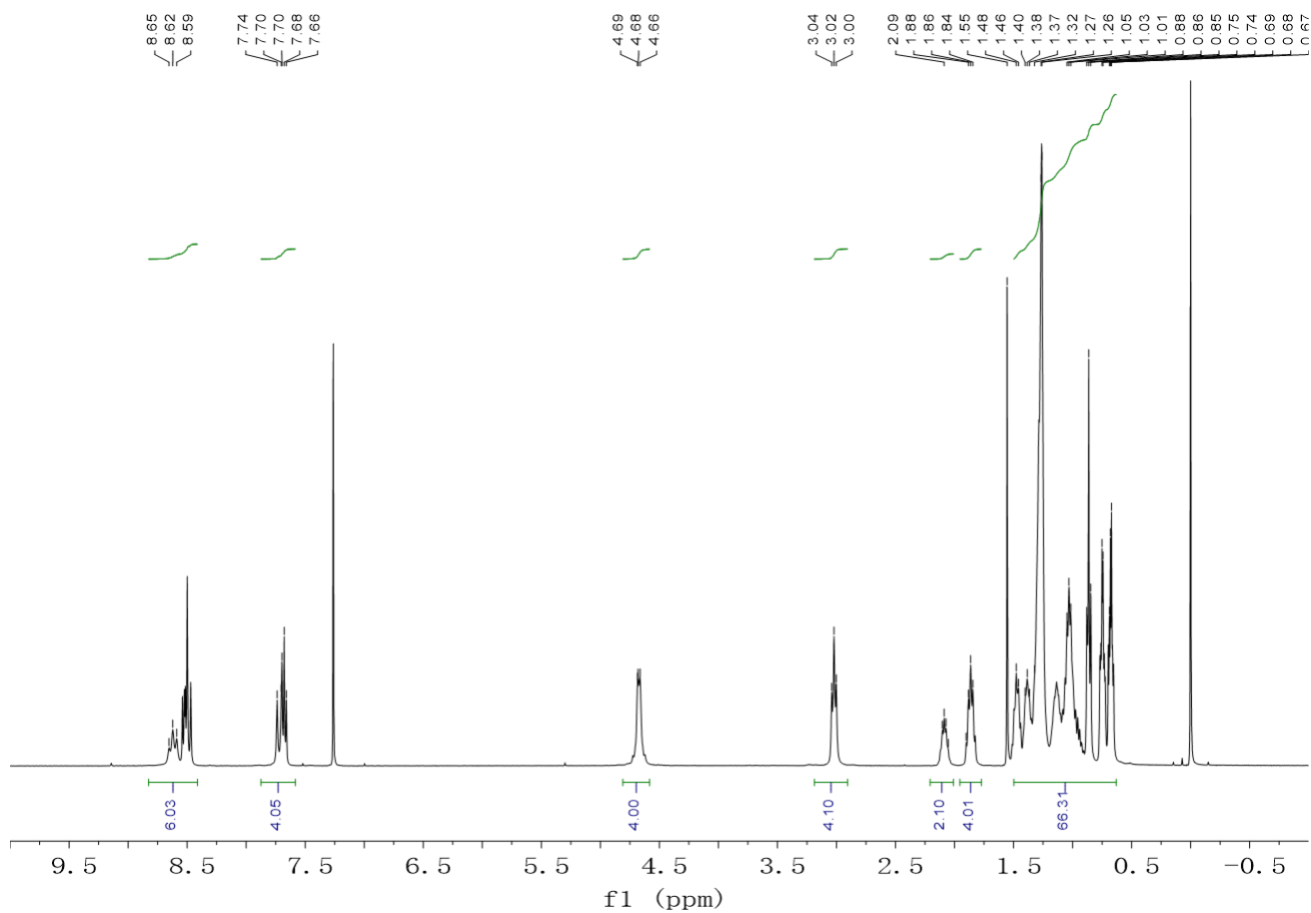

**Supplementary Fig. 20.** <sup>1</sup>H NMR spectra of BTPV-4F.

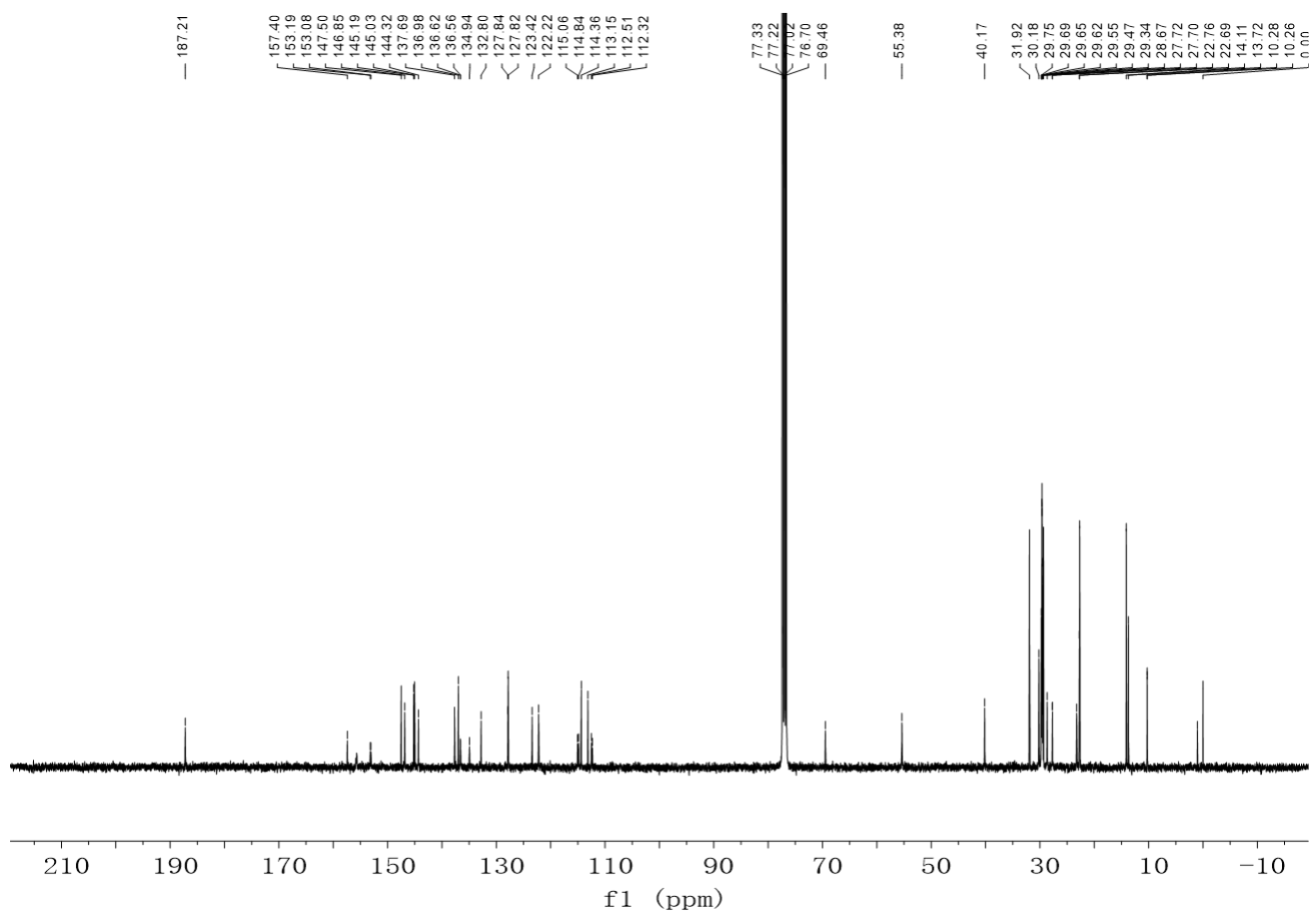

**Supplementary Fig. 21.**  $^{13}\text{C}$ NMR spectra of BTPV-4F.



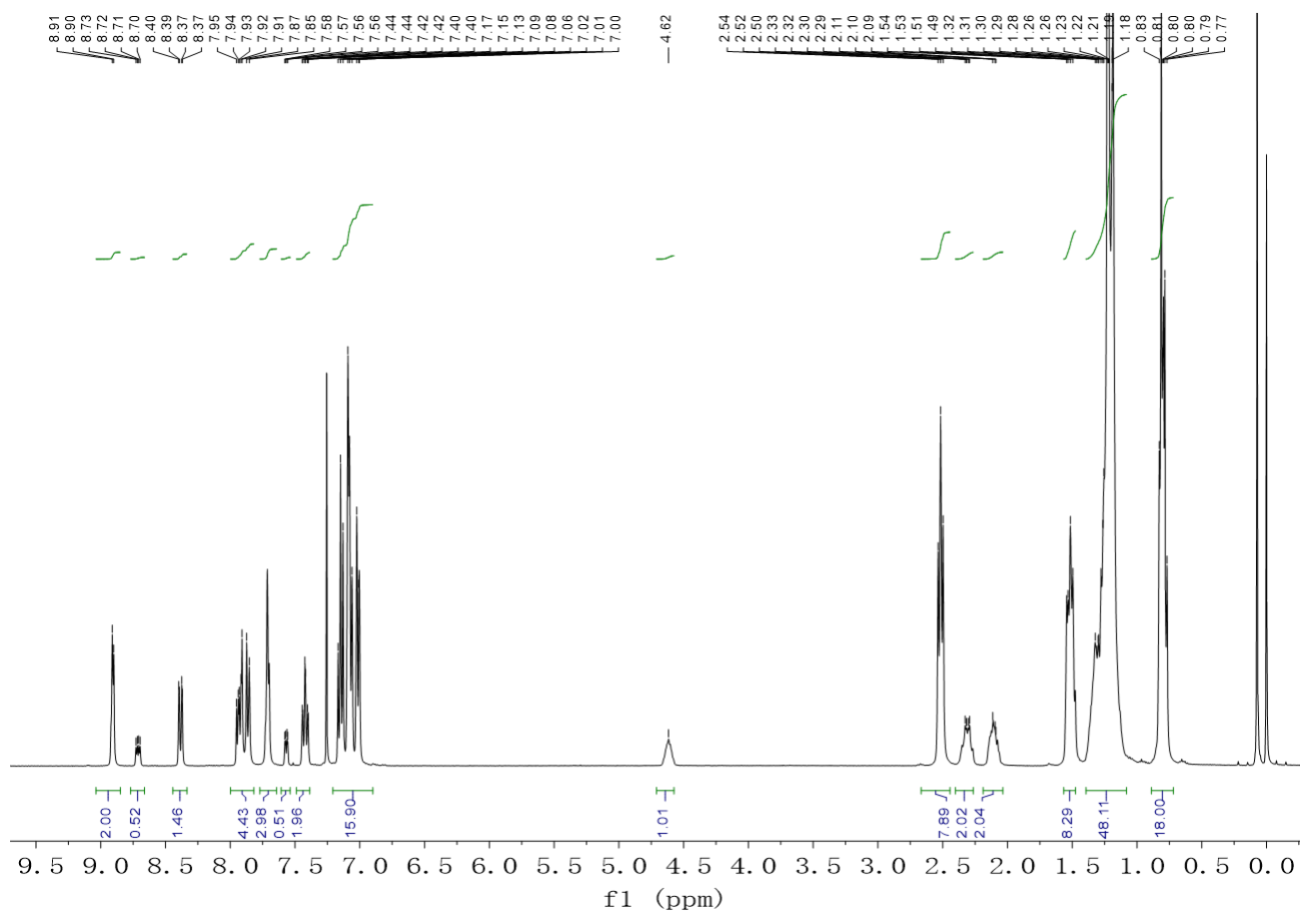

**Supplementary Fig. 22.**  $^1\text{H}$ NMR spectra of *m*-DTC-2F.

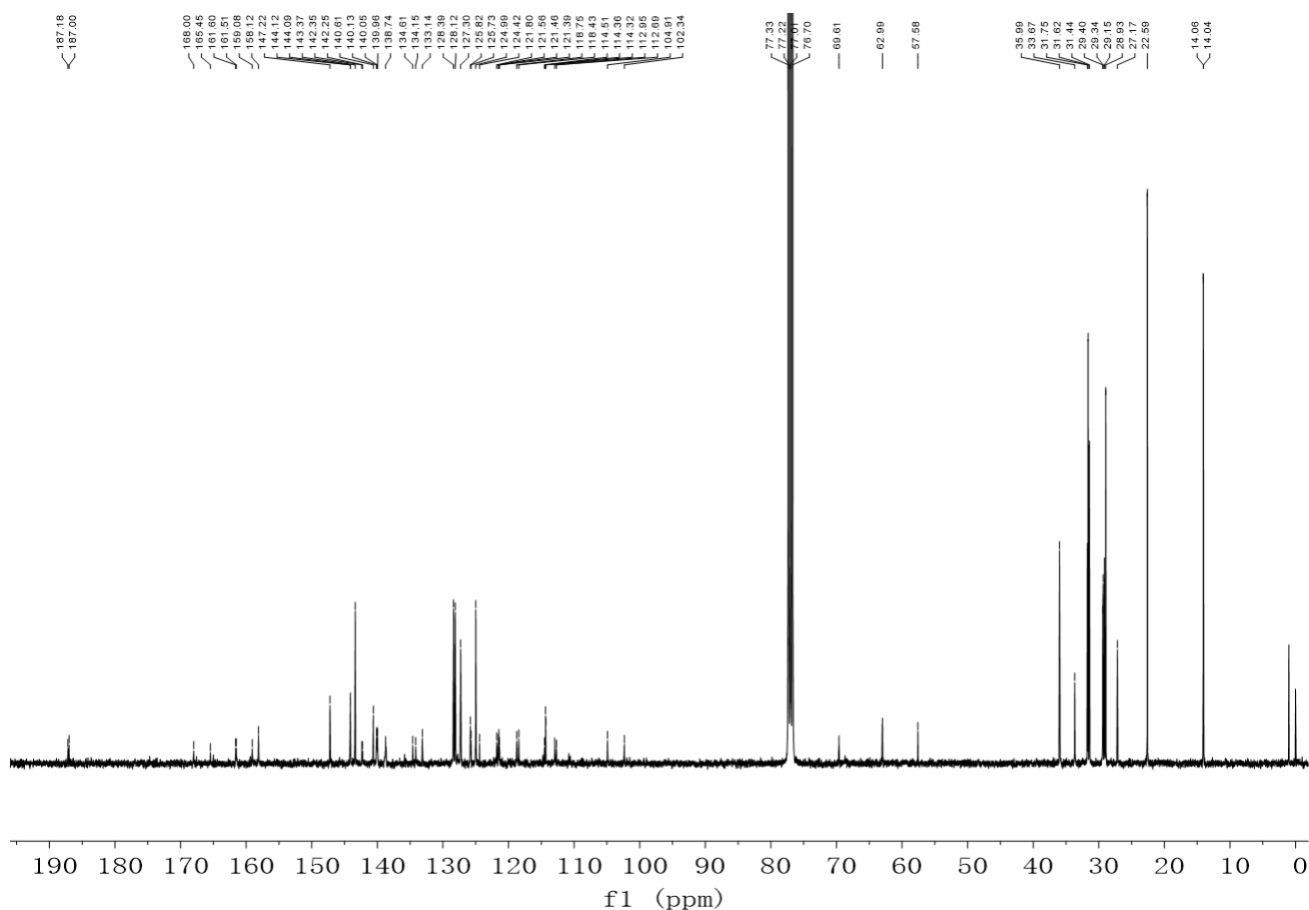

Supplementary Fig. 23.  $^{13}\text{C}$ NMR spectra of *m*-DTC-2F.

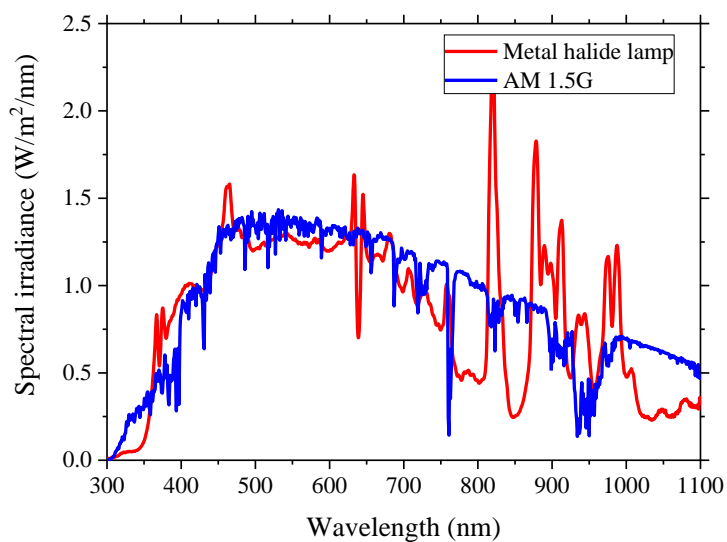

Supplementary Fig. 24. Illumination spectrum of light source used in *J-V* curve measurements.

## SUPPLEMENTARY TABLES

**Supplementary Table 1.** Physicochemical properties and electronic energy levels of acceptors.

|                  | $\lambda_{\max}^a$ | $\lambda_{\text{edge}}^a$ | $E_g^{\text{opt } b}$ | $E_{\text{HOMO}}^c$ | $E_{\text{LUMO}}^c$ |
|------------------|--------------------|---------------------------|-----------------------|---------------------|---------------------|
|                  | nm                 | nm                        | eV                    | eV                  | eV                  |
| BTPV-4F          | 887                | 1021                      | 1.21                  | -5.39               | -4.08               |
| <i>m</i> -DTC-2F | 705                | 770                       | 1.61                  | -5.67               | -3.89               |

<sup>a</sup>Absorption of the films. <sup>b</sup> Optical bandgap calculated from the absorption edge of the films:  $E_g^{\text{opt}} = 1240/\lambda_{\text{edge}}$ . <sup>c</sup> Energy levels calculated according to the equation  $E_{\text{LUMO/HOMO}} = -e (E_{\text{red/ox}} + 4.36)$  (eV)

**Supplementary Table 2.** Photovoltaic performance parameters of the OSCs based on PTB7-Th:BTPV-4F with different D:A ratio, with 0.5 % 1-CN as additive and thermal annealing at 100 °C for 5 min, under the illumination of AM1.5G, 100 mW cm<sup>-2</sup>.

| D/ A ratios | $V_{\text{oc}}$ (V) | $J_{\text{sc}}$ (mA cm <sup>-2</sup> ) | FF (%) | PCE (%) |
|-------------|---------------------|----------------------------------------|--------|---------|
| 1:1         | 0.65                | 27.2                                   | 65.3   | 11.5    |
| 1:1.5       | 0.65                | 28.3                                   | 65.9   | 12.1    |
| 1:1.7       | 0.64                | 27.7                                   | 65.7   | 11.6    |

**Supplementary Table 3.** Photovoltaic performance parameters of the ternary OSCs based on PTB7-Th:BTPV-4F:PC<sub>71</sub>BM with different PC<sub>71</sub>BM content, and with 0.5 % 1-CN as additive and thermal annealing at 100 °C for 5 min, under the illumination of AM1.5G, 100 mW cm<sup>-2</sup>.

| D/A <sub>1</sub> /A <sub>2</sub> ratios | $V_{\text{oc}}$ (V) | $J_{\text{sc}}$ (mA cm <sup>-2</sup> ) | FF (%) | PCE (%) |
|-----------------------------------------|---------------------|----------------------------------------|--------|---------|
| 1:1.5:0.1                               | 0.66                | 28.5                                   | 67.6   | 12.7    |
| 1:1.5:0.15                              | 0.67                | 28.9                                   | 69.3   | 13.4    |
| 1:1.5:0.20                              | 0.67                | 27.7                                   | 69.5   | 12.9    |

**Supplementary Table 4.** Photovoltaic performance parameters of the OSCs based on PTB7-Th:BTPV-4F:PC<sub>71</sub>BM with different CN additive volume ratio, with D/A weight ratio of 1:1.5:0.15 and thermal annealing at 100 °C for 5 min, under the illumination of AM1.5G, 100 mW cm<sup>-2</sup>.

| CN (vol%) | $V_{oc}$<br>(V) | $J_{sc}$<br>(mA cm <sup>-2</sup> ) | FF<br>(%) | PCE<br>(%) |
|-----------|-----------------|------------------------------------|-----------|------------|
| 0         | 0.68            | 20.9                               | 61.4      | 8.7        |
| 0.2       | 0.68            | 25.6                               | 65.6      | 11.4       |
| 0.5       | 0.67            | 28.9                               | 69.3      | 13.4       |
| 0.8       | 0.66            | 28.5                               | 68.2      | 12.8       |

**Supplementary Table 5.** Photovoltaic performance parameters of the OSCs based on PTB7-Th:BTPV-4F:PC<sub>71</sub>BM with different annealing temperature, and with D/A weight ratio of 1:1.5:0.15 and thermal annealing at 100 °C for 5 min, under the illumination of AM1.5G, 100 mW cm<sup>-2</sup>.

| Annealing<br>temperature (°C) | $V_{oc}$<br>(V) | $J_{sc}$<br>(mA cm <sup>-2</sup> ) | FF<br>(%) | PCE<br>(%) |
|-------------------------------|-----------------|------------------------------------|-----------|------------|
| As cast                       | 0.68            | 26.2                               | 66.1      | 11.8       |
| 100                           | 0.67            | 28.5                               | 68.6      | 13.1       |
| 110                           | 0.67            | 28.9                               | 69.3      | 13.4       |
| 120                           | 0.66            | 28.2                               | 68.9      | 12.8       |

**Supplementary Table 6.** Photovoltaic performance parameters of the OSCs based on PTB7-Th:BTPV-4F:PC<sub>71</sub>BM with different active layer thickness, under the illumination of AM1.5G, 100 mW cm<sup>-2</sup>.

| Thickness (nm) | $V_{oc}$<br>(V) | $J_{sc}$<br>(mA cm <sup>-2</sup> ) | FF<br>(%) | PCE<br>(%) |
|----------------|-----------------|------------------------------------|-----------|------------|
| 80             | 0.67            | 27.2                               | 69.7      | 12.7       |
| 100            | 0.67            | 28.9                               | 69.3      | 13.4       |
| 120            | 0.66            | 27.8                               | 66.7      | 12.2       |

**Supplementary Table 7.** Survey of the optical bandgap of the narrow bandgap acceptors and device performance of the acceptors-based OSCs reported in literatures.

| Active layer                                     | Optical bandgap (eV) | $V_{oc}$ (V) | $J_{sc}$ (mA cm <sup>-2</sup> ) | $J_{sc, EQE}$ (mA cm <sup>-2</sup> ) | FF (%) | PCE (%) | Ref. |
|--------------------------------------------------|----------------------|--------------|---------------------------------|--------------------------------------|--------|---------|------|
| PTB7-Th:CO <sub>8</sub> DFIC:PC <sub>71</sub> BM | 1.26                 | 0.70         | 28.20                           | 26.92                                | 71.0   | 14.08   | 1    |
| PTB7-Th:F8IC                                     | 1.27                 | 0.67         | 25.61                           | 24.64                                | 71.5   | 12.30   | 2    |
| PTB7-Th:FOIC                                     | 1.32                 | 0.74         | 24.0                            | 23.1                                 | 67.1   | 12.00   | 3    |
| PTB7-Th:IEICO-4F                                 | 1.24                 | 0.71         | 24.90                           | 24.00                                | 66.3   | 10.4    | 4    |
| PM6:Y1-4F                                        | 1.31                 | 0.838        | 24.8                            | 24.1                                 | 71.2   | 14.80   | 5    |
| PM6:Y11                                          | 1.31                 | 0.85         | 26.56                           | 24.15                                | 73.1   | 16.54   | 6    |
| PTB7-Th:IEICO-4Cl                                | 1.23                 | 0.73         | 22.80                           | 22.20                                | 62.0   | 10.30   | 7    |
| PTB7-Th:3TT-OCIC                                 | 1.29                 | 0.69         | 27.60                           | 26.02                                | 69.0   | 13.13   | 8    |
| PTB7-Th:3TT-FIC                                  | 1.25                 | 0.67         | 27.73                           | 26.41                                | 73.0   | 13.53   | 9    |
| PTB7-Th:P6IC                                     | 1.30                 | 0.69         | 25.0                            | 23.7                                 | 70.2   | 10.2    | 10   |
| PTB7-Th:IXIC-2Cl                                 | 1.30                 | 0.73         | 23.6                            | 23.3                                 | 70.9   | 12.2    | 11   |
| PTB7-Th:IXIC-4Cl                                 | 1.25                 | 0.69         | 22.9                            | 22.8                                 | 71.2   | 10.2    | 11   |
| PTB7-Th:IFIC-i-4F                                | 1.27                 | 0.65         | 24.85                           | 24.01                                | 67.0   | 10.87   | 12   |
| PTB7-Th:DTPC-DFIC                                | 1.22                 | 0.76         | 21.92                           | 21.27                                | 61.3   | 10.21   | 13   |
| PTB7-Th:FUIC                                     | 1.22                 | 0.69         | 22.9                            | 22.1                                 | 70.6   | 11.20   | 14   |
| PBDB-T:H2                                        | 1.23                 | 0.781        | 24.40                           | 23.50                                | 69     | 13.15   | 15   |
| PBDB-T:H3                                        | 1.23                 | 0.757        | 25.84                           | 25.78                                | 70     | 13.75   | 15   |
| <b>This work</b>                                 | 1.21                 | 0.67         | 28.9                            | 28.3                                 | 69.3   | 13.4    |      |

**Supplementary Table 8.** Crystallographic Parameters from GIWAX measurement.

| Active layer                        | $\pi$ - $\pi$ stacking distance(OP) |                    | $\pi$ - $\pi$ stacking coherence (OP) |                        | Integrated Intensity  |
|-------------------------------------|-------------------------------------|--------------------|---------------------------------------|------------------------|-----------------------|
|                                     | q ( $\text{\AA}^{-1}$ )             | d ( $\text{\AA}$ ) | $\Delta q$ ( $\text{\AA}^{-1}$ )      | CCL [010] $\text{\AA}$ |                       |
| PTB7-Th:BTPV-4F                     | 1.76                                | 3.57               | 0.15                                  | 41                     | $1.42 \times 10^{-7}$ |
| PTB7-Th:BTPV-4F:PC <sub>71</sub> BM | 1.77                                | 3.55               | 0.14                                  | 46                     | $1.71 \times 10^{-7}$ |

Note: The (010)  $\pi$ - $\pi$  stacking peaks of PTB7-Th and BTPV-4F are relatively close together and the disorder is so large that the contributions in the blends cannot be separated.

**Supplementary Table 9.** Photovoltaic performance parameters of the OSCs based on PM6:*m*-DTC-2F with different D:A ratio, and with 0.3 % DIO as additive and thermal annealing at 120 °C for 5 min, under the illumination of AM1.5G, 100 mW cm<sup>-2</sup>.

| D/A ratios | $V_{oc}$ (V) | $J_{sc}$ (mA cm <sup>-2</sup> ) | FF (%) | PCE (%) |
|------------|--------------|---------------------------------|--------|---------|
| 1:1        | 1.00         | 16.3                            | 69.5   | 11.3    |
| 1:1.5      | 1.00         | 17.1                            | 71.3   | 12.2    |
| 1:1.7      | 0.99         | 16.8                            | 70.7   | 11.8    |

**Supplementary Table 10.** Photovoltaic performance parameters of the OSCs based on PM6:*m*-DTC-2F with different DIO additive volume, and with D/A weight ratio of 1:1.5 and thermal annealing at 120 °C for 5 min, under the illumination of AM1.5G, 100 mW cm<sup>-2</sup>.

| DIO (vol%) | $V_{oc}$ (V) | $J_{sc}$ (mA cm <sup>-2</sup> ) | FF (%) | PCE (%) |
|------------|--------------|---------------------------------|--------|---------|
| 0          | 1.01         | 16.4                            | 69.5   | 11.5    |
| 0.1        | 1.00         | 16.7                            | 69.7   | 11.7    |
| 0.3        | 1.00         | 17.1                            | 71.3   | 12.2    |
| 0.5        | 0.99         | 17.2                            | 70.7   | 12.0    |

**Supplementary Table 11.** Photovoltaic performance parameters of the OSCs based on PM6:*m*-DTC-2F with different annealing temperature and with D/A weight ratio of 1:1.5 and thermal annealing for 5 min, under the illumination of AM1.5G, 100 mW cm<sup>-2</sup>.

| Annealing temperature (°C) | $V_{oc}$ (V) | $J_{sc}$ (mA cm <sup>-2</sup> ) | FF (%) | PCE (%) |
|----------------------------|--------------|---------------------------------|--------|---------|
| As cast                    | 1.01         | 16.0                            | 68.7   | 11.1    |
| 100                        | 1.00         | 16.8                            | 70.5   | 11.8    |
| 120                        | 1.00         | 17.1                            | 71.3   | 12.2    |
| 140                        | 0.99         | 16.8                            | 69.4   | 11.5    |

**Supplementary Table 12.** Photovoltaic performance parameters of the OSCs based on PM6:*m*-DTC-2F with different active layer thickness, under the illumination of AM1.5G, 100 mW cm<sup>-2</sup>.

| Thickness (nm) | $V_{oc}$ (V) | $J_{sc}$ (mA cm <sup>-2</sup> ) | FF (%) | PCE (%) |
|----------------|--------------|---------------------------------|--------|---------|
| 100            | 1.00         | 17.1                            | 71.3   | 12.2    |
| 120            | 1.00         | 17.3                            | 69.8   | 12.1    |
| 140            | 0.99         | 17.4                            | 68.3   | 11.7    |
| 160            | 0.98         | 16.9                            | 67.5   | 11.2    |



**Supplementary Table 13.** Photovoltaic performance parameters of the tandem OSCs with different thicknesses of the sub-cells, under the illumination of AM1.5G, 100 mW cm<sup>-2</sup>.

| Thickness (nm) |           | $V_{oc}$ | $J_{sc}$               | FF   | PCE  |
|----------------|-----------|----------|------------------------|------|------|
| Front cell     | Rear cell | (V)      | (mA cm <sup>-2</sup> ) | (%)  | (%)  |
| 120            | 100       | 1.66     | 13.2                   | 70.0 | 15.6 |
| 130            | 100       | 1.65     | 13.7                   | 68.6 | 15.8 |
| 140            | 100       | 1.65     | 14.3                   | 67.7 | 16.4 |
| 150            | 100       | 1.64     | 14.1                   | 67.2 | 15.9 |
| 160            | 100       | 1.64     | 14.0                   | 66.7 | 15.6 |
| 140            | 80        | 1.65     | 13.8                   | 68.5 | 15.8 |
| 140            | 120       | 1.64     | 14.0                   | 67.0 | 15.7 |

## SUPPLEMENTARY METHOD

### DFT calculation

ORCA (version 4.2.1) was utilized for all the DFT calculations mentioned in this article<sup>16</sup>. The molecular geometries were optimized with a range-separated hybrid functional of  $\omega$ B97X-D3 and a basis set of def2-SVP. The straight and branched alkyl chains were simplified to methyl and isopropyl, respectively, for saving time. The single point energies and gradients were further calculated with a perturbatively corrected double-hybrid functional of PWPB95 with a dispersion correction of D3BJ and a basis set of def2-TZVPP<sup>17,18</sup>. The band gaps were calculated with a functional of B3PW and a basis set of def2-TZVP. The excited states incorporating with SMD solvation model were calculated by TD-DFT with a hybrid functional of B3LYP and a basis set of def2-SVP<sup>19</sup>. The localized orbital locator (LOL), Mayer bond order were analyzed by Multiwfn and VMD (version 1.9.3) for visualization<sup>20</sup>.

### Theoretical efficiency calculation

For the 2-terminal monolithic tandem cell with two sub-cells in series, The PCE of the tandem cell is therefore calculated as follows:

$$\text{PCE}_{\text{Tandem}} = V_{\text{OC Tandem}} \times J_{\text{SC Tandem}} \times \text{FF}_{\text{Tandem}} / P_{\text{light}}$$

The three photovoltaic parameters  $V_{\text{oc}}$ ,  $J_{\text{sc}}$  and FF of a 2-terminal monolithic tandem cell are obtained as follows:

1. The  $V_{\text{oc}}$  of sub-cells is determined by the optical bandgap ( $E_{\text{g}}$ ) and  $V_{\text{oc}}$  loss ( $E_{\text{loss}}$ ) of the sub-cells.

$$V_{\text{oc, front}} = E_{\text{g, front}} - E_{\text{loss, front}}$$

$$V_{\text{oc, rear}} = E_{\text{g, rear}} - E_{\text{loss, rear}}$$

For the  $E_{\text{loss}}$  of sub-cells, the  $E_{\text{loss, front}}$  and  $E_{\text{loss, rear}}$  are assumed to be 0.55eV according to reported works.

The  $V_{oc}$  of the tandem cell is therefore calculated as being the exact sum of the respective  $V_{oc}$  of each sub-cell are assumed to be

$$V_{oc, tandem} = V_{oc, front} + V_{oc, rear}$$

2. The  $J_{sc}$  of the tandem cell could be obtained from equation

$$J_{sc, tandem} = \min(J_{sc, front}, J_{sc, rear})$$

The  $J_{sc}$  of the front cell in the tandem device under AM1.5G is given by

$$\int_{300}^{\lambda_1} Sun(\lambda) \cdot EQE(\lambda) \cdot d\lambda$$

where  $\lambda_1$  is the absorption onset ( $1240/E_{g, front}$ ) of front cell,  $Sun(\lambda)$  is the spectral irradiance in AM 1.5G, The  $EQE(\lambda)$  is assumed as 75% with all wavelengths.

The  $J_{sc}$  of the rear cell in the tandem device under AM1.5G is given by

$$\frac{1}{2} \int_{300}^{\lambda_2} Sun(\lambda) \cdot EQE(\lambda) \cdot d\lambda$$

where  $\lambda_2$  is the absorption onset ( $1240/E_{g, rear}$ ) of rear cell,  $Sun(\lambda)$  is the spectral irradiance in AM 1.5G, The  $EQE(\lambda)$  is assumed as 75% with all wavelengths.

3. The FF of the tandem cell is assumed to be 0.75.

## Supplementary References

1. Xiao, Z. *et al.* Ternary organic solar cells offer 14% power conversion efficiency. *Sci. Bull.* **62**, 1562–1564 (2017)
2. Dai, S. *et al.* Enhancing the Performance of Polymer Solar Cells via Core Engineering of NIR-Absorbing Electron Acceptors. *Adv. Mater.* **30**, 1706571 (2018).
3. Li, T. *et al.* Fused tris(thienothiophene)-based electron acceptor with strong near-infrared absorption for high-performance As-Cast Solar Cells. *Adv. Mater.* **30**, 1705969 (2018).
4. Yao, H. *et al.* Design, Synthesis, and Photovoltaic Characterization of a Small Molecular Acceptor with an Ultra-Narrow Band Gap. *Angew. Chem. Int. Ed.* **56**, 3045–3049 (2017).
5. Wang, R. *et al.* Rational Tuning of Molecular Interaction and Energy Level Alignment Enables High-Performance Organic Photovoltaics. *Adv. Mater.* **31**, 1904215 (2019).
6. Liu, S. *et al.* High-efficiency organic solar cells with low non-radiative recombination loss and low energetic disorder. *Nat. Photonics* 1–11 (2020). doi:10.1038/s41566-019-0573-5
7. Cui, Y. *et al.* Efficient Semitransparent Organic Solar Cells with Tunable Color enabled by an Ultralow-Bandgap Nonfullerene Acceptor. *Adv. Mater.* **29**, 1703080 (2017).
8. Gao, H. H. *et al.* Achieving Both Enhanced Voltage and Current through Fine-Tuning Molecular Backbone and Morphology Control in Organic Solar Cells. *Adv. Energy Mater.* **9**, 1901024 (2019).
9. Gao, H. H. *et al.* A New Nonfullerene Acceptor with Near Infrared Absorption for High Performance Ternary-Blend Organic Solar Cells with Efficiency over 13%. *Adv. Sci.* **5**, 1800307 (2018).
10. Ma, W. *et al.* Enhancing Performance of Fused-Ring Electron Acceptor Using Pyrrole Instead of Thiophene. *ACS Appl. Mater. Interfaces* **12**, 14029-14036 (2020).
11. Chen, Y. *et al.* Modulation of End Groups for Low-Bandgap Nonfullerene Acceptors Enabling High-Performance Organic Solar Cells. *Adv. Energy Mater.* **8**, 1801203 (2018).
12. Chen, F. X. *et al.* Near-Infrared Electron Acceptors with Fluorinated Regioisomeric Backbone for Highly Efficient Polymer Solar Cells. *Adv. Mater.* **30**, 1803769 (2018).
13. Yao, Z. *et al.* Dithienopicenocarbazole-Based Acceptors for Efficient Organic Solar Cells with

- Optoelectronic Response Over 1000 nm and an Extremely Low Energy Loss. *J. Am. Chem. Soc.* **140**, 2054–2057 (2018).
14. Li, T. *et al.* Facile synthesis of high-performance nonfullerene acceptor isomers via a one stone two birds strategy. *J. Mater. Chem. A* **7**, 20667–20674 (2019).
  15. He, C. *et al.* Near infrared electron acceptors with a photoresponse beyond 1000 nm for highly efficient organic solar cells. *J. Mater. Chem. A* **8**, 18154–18161 (2020).
  16. Neese, F. Software update: the ORCA program system, version 4.0. *Wiley Interdisciplinary Reviews: Computational Molecular Science* **8**, 33 (2018).
  17. Grimme, S., Antony, J., Ehrlich, S. & Krieg, H. A consistent and accurate ab initio parametrization of density functional dispersion correction (DFT-D) for the 94 elements H–Pu. *The Journal of Chemical Physics* **132**, 154104 (2010).
  18. Grimme, S., Ehrlich, S. & Goerigk, L. Effect of the damping function in dispersion corrected density functional theory. *Journal of Computational Chemistry* **32**, 1456–1465 (2011).
  19. Marenich, A. V. *et al.* Universal solvation model based on solute electron density and on a continuum model of the solvent defined by the bulk dielectric constant and atomic surface tensions. *J. Phy. Chem. B* **113**, 6378–6396 (2017)
  20. Lu, T. & Chen, F. Multiwfn: A multifunctional wavefunction analyzer. *Journal of Computational Chemistry* **33**, 580–592 (2012).
