# Supplementary material for: High performance tandem organic solar cells via a strongly infrared-absorbing narrow bandgap acceptor
Source: PubMed Central journal article supplement (PMC7794321; doi:10.1038/s41467-020-20431-6), 2021-01-08
Supplement: 41467_2020_20431_MOESM3_ESM.pdf [file 41467_2020_20431_MOESM3_ESM.pdf]

## Solar Cells Reporting Summary

Nature Research wishes to improve the reproducibility of the work that we publish. This form is intended for publication with all accepted papers reporting the characterization of photovoltaic devices and provides structure for consistency and transparency in reporting. Some list items might not apply to an individual manuscript, but all fields must be completed for clarity.

For further information on Nature Research policies, including our [data availability policy](#), see [Authors & Referees](#).

### ► Experimental design

**Please check: are the following details reported in the manuscript?**

#### 1. Dimensions

- Area of the tested solar cells  Yes  No Area of the tested solar cells is 0.05 cm<sup>2</sup> defined by optical microscope (Olympus BX51).
- Method used to determine the device area  Yes  No Device area is determined by a mask with 0.048 cm<sup>2</sup>

#### 2. Current-voltage characterization

- Current density-voltage (J-V) plots in both forward and backward direction  Yes  No Generally, organic photovoltaic devices do not have forward and backward problems. And we only scan the device in forward direction.
- Voltage scan conditions  Yes  No The voltage was scanned from -1.5 V to 2 V. The voltage step and delay time were 10 mV and 1ms, respectively.  
*For instance: scan direction, speed, dwell times*
- Test environment  Yes  No Devices were characterized at room temperature in In N<sub>2</sub>-filled glove box  
*For instance: characterization temperature, in air or in glove box*
- Protocol for preconditioning of the device before its characterization  Yes  No No preconditioning protocol.
- Stability of the J-V characteristic  Yes  No We only tested the long-term stability.  
*Verified with time evolution of the maximum power point or with the photocurrent at maximum power point; see ref. 7 for details.*

#### 3. Hysteresis or any other unusual behaviour

- Description of the unusual behaviour observed during the characterization  Yes  No No hysteresis was observed in our device.
- Related experimental data  Yes  No No.

#### 4. Efficiency

- External quantum efficiency (EQE) or incident photons to current efficiency (IPCE)  Yes  No EQE curve is shown in Figure 2c and Figure 4d.
- A comparison between the integrated response under the standard reference spectrum and the response measure under the simulator  Yes  No Relative information is provided in Table 1-2. The integrated J<sub>sc</sub> obtained from the EQE spectra agrees well with the J<sub>sc</sub> value obtained from the J-V curves under the simulator within 2% deviation
- For tandem solar cells, the bias illumination and bias voltage used for each subcell  Yes  No Light bias obtained by 550 nm short wave pass filters and 850 nm long wave pass filters were selected to excite (saturate) the front and rear cells, respectively.

#### 5. Calibration

- Light source and reference cell or sensor used for the characterization  Yes  No Relative information is provided in method section.
- Confirmation that the reference cell was calibrated and certified  Yes  No Relative information is provided in method section.

|                                                                                                                                                                                               |                                                                        |                                                                                                            |
|-----------------------------------------------------------------------------------------------------------------------------------------------------------------------------------------------|------------------------------------------------------------------------|------------------------------------------------------------------------------------------------------------|
| Calculation of spectral mismatch between the reference cell and the devices under test                                                                                                        | <input checked="" type="checkbox"/> Yes<br><input type="checkbox"/> No | Relative information is provided in method section.                                                        |
| <b>6. Mask/aperture</b>                                                                                                                                                                       |                                                                        |                                                                                                            |
| Size of the mask/aperture used during testing                                                                                                                                                 | <input checked="" type="checkbox"/> Yes<br><input type="checkbox"/> No | Device area is determined by a mask with area of 0.048 cm <sup>2</sup> .                                   |
| Variation of the measured short-circuit current density with the mask/aperture area                                                                                                           | <input checked="" type="checkbox"/> Yes<br><input type="checkbox"/> No | The variation is within 0.3%.                                                                              |
| <b>7. Performance certification</b>                                                                                                                                                           |                                                                        |                                                                                                            |
| Identity of the independent certification laboratory that confirmed the photovoltaic performance                                                                                              | <input type="checkbox"/> Yes<br><input checked="" type="checkbox"/> No | The photovoltaic performance of our devices was not confirmed from independent certification laboratories  |
| A copy of any certificate(s)<br><i>Provide in Supplementary Information</i>                                                                                                                   | <input type="checkbox"/> Yes<br><input checked="" type="checkbox"/> No | The photovoltaic performance of our devices was not confirmed from independent certification laboratories  |
| <b>8. Statistics</b>                                                                                                                                                                          |                                                                        |                                                                                                            |
| Number of solar cells tested                                                                                                                                                                  | <input checked="" type="checkbox"/> Yes<br><input type="checkbox"/> No | The average PCE of OSC is obtained from 30 independent devices.                                            |
| Statistical analysis of the device performance                                                                                                                                                | <input checked="" type="checkbox"/> Yes<br><input type="checkbox"/> No | Statistical results of the devices are shown in figure 4e.                                                 |
| <b>9. Long-term stability analysis</b>                                                                                                                                                        |                                                                        |                                                                                                            |
| Type of analysis, bias conditions and environmental conditions<br><i>For instance: illumination type, temperature, atmosphere humidity, encapsulation method, preconditioning temperature</i> | <input checked="" type="checkbox"/> Yes<br><input type="checkbox"/> No | Long-term photostability analysis can be found in figure 5b and conditions can be found in method section. |
